# Supplementary material for: Highly selective colorimetric sensing of Cu2+ using a Schiff base derivative immobilized on polyvinyl alcohol microspheres
Source: Royal Society of Chemistry journal article supplement (doi:10.1039/c8nj01973h), 2018-01-01
Supplement: c8nj01973h1.pdf [file c8nj01973h1.pdf]

**Electronic Supplementary Material (ESI) for New Journal of  
Chemistry**

**Electronic Supplementary Information**

**Highly selective colorimetric sensing of Cu<sup>2+</sup> using Schiff  
base derivative immobilized on polyvinyl alcohol  
microspheres**

Xue Bai<sup>1, 2</sup>, Xudong Zhang<sup>1</sup>, Haixin Gu<sup>1</sup>, Fengjie Li<sup>3</sup>, Wei Huang<sup>1</sup>, Lu Liang<sup>1</sup>,  
Zhengfang Ye<sup>2\*</sup>

1 Key Laboratory of Integrated Regulation and Resource Development on Shallow  
Lake of Ministry of Education, College of Environment, Hohai University, Nanjing  
210098, China

2 Department of Environmental Engineering, Peking University, The Key Laboratory  
of Water and Sediment Sciences, Ministry of Education, Beijing 100871, China

3 Laboratory of Eco-Environmental Engineering Research, College of Resources and  
Environment, Huazhong Agricultural University, Wuhan, 430070, China

\* E-mail address: [yezhengfang@iee.pku.edu.cn](mailto:yezhengfang@iee.pku.edu.cn)

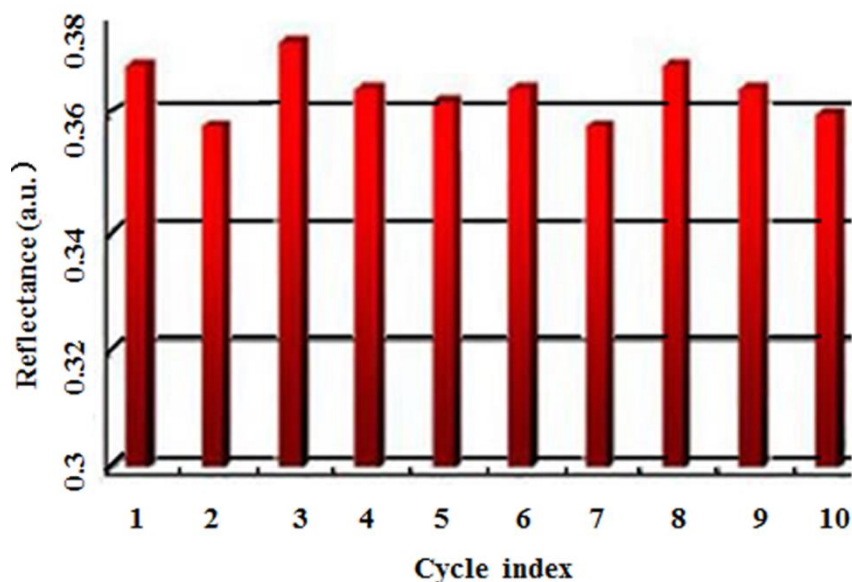

Fig. S1 Reflection spectra of PVA-SH microspheres after multiple elution.

Reusability is an important characterization of solid indicator in practical application. After detection, we measure the reusability and stability through the regeneration process of PVA-SH microspheres. The microspheres were recycled after detection by filtration, which adequately caused the color to yellow by applying ethylenediaminetetraacetic acid (EDTA) to analyze the reusability after drying. This process was repeated nine times, and the results confirmed that EDTA could effectively regenerate PVA-SH. The slight change in the reflection intensity (Fig. S1) also confirmed the reusability of the PVA-SH microspheres.

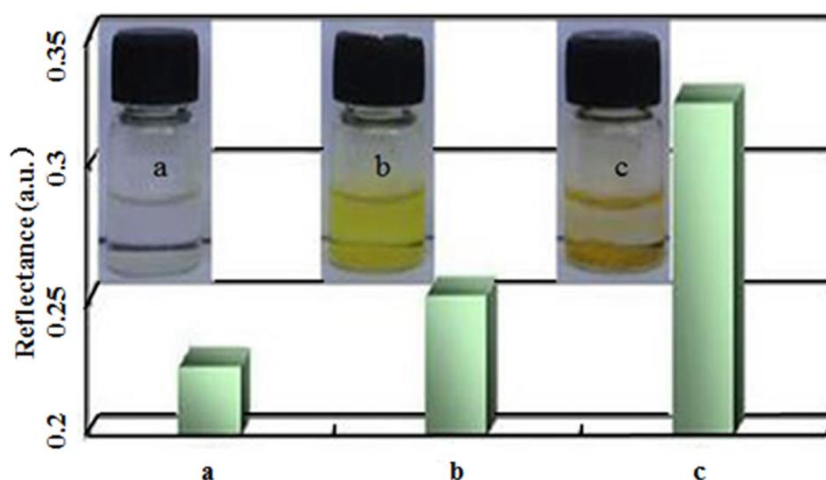

Fig. S2 Absorbance and color changes of PVA-SH in river water (a) pH 7 no addition of  $\text{Cu}^{2+}$ ; (b) pH 7 addition of  $10 \mu\text{M Cu}^{2+}$ ; (c) pH 12 addition of  $10 \mu\text{M Cu}^{2+}$

An untreated water sample was collected from Qinhuai River in Nanjing, China to evaluate the efficiency of PVA-SH in practical applications. As shown in Fig. S2, the notable change of the solution color from white to yellow upon the addition of  $\text{Cu}^{2+}$  could be observed by the naked eye, after the pH level was adjusted to 7. By contrast, the color change became increasingly distinct when the pH level was adjusted to 12. The results illustrated that PVA-SH has potential to be an excellent practical sensor for  $\text{Cu}^{2+}$  detection.
